# Supplementary material for: Compositional balance should be considered in soil particle-size fractions mapping using hybrid interpolators
Source: Copernicus journal article supplement (doi:10.5194/hess-2020-384), 2020-08-31
Supplement: Supplementary file 1 [file hess-2020-384-supplement.pdf]

1     **Supplementary Material to paper ‘Compositional balance should be considered**  
2             **in soil particle-size fractions mapping using hybrid interpolators’**

3                     **Mo Zhang, Wenjiao Shi**

4

5     This supplementary material consists of details of statistical chart and prediction results  
6     in the paper and in the following 3 sections. **Section S1** is the precedence table of model  
7     performance in order to define which choices of ILR balance is the best. **Section S2**  
8     shows the distribution and their relative values of soil sampling points. **Section S3**  
9     includes the fitted biplots using random sampling test.

## 10

11

12

13

|      | GLM       |           |           | GLMRK     |           |           | RF       |           |           | RFRK      |           |           |
|------|-----------|-----------|-----------|-----------|-----------|-----------|----------|-----------|-----------|-----------|-----------|-----------|
|      | SBP1      | SBP2      | SBP3      | SBP1      | SBP2      | SBP3      | SBP1     | SBP2      | SBP3      | SBP1      | SBP2      | SBP3      |
| ME   | 3         | 1         | 2         | 3         | 2         | 1         | 1        | 2         | 2         | 1         | 2         | 3         |
|      | 1         | 2         | 3         | 1         | 2         | 3         | 1        | 3         | 2         | 1         | 2         | 3         |
|      | 1         | 2         | 3         | 1         | 2         | 3         | 1        | 3         | 2         | 1         | 2         | 3         |
| SUM1 | <b>5</b>  | <b>5</b>  | <b>8</b>  | <b>5</b>  | <b>6</b>  | <b>7</b>  | <b>3</b> | <b>8</b>  | <b>6</b>  | <b>3</b>  | <b>6</b>  | <b>9</b>  |
| RMSE | 1         | 3         | 2         | 1         | 3         | 2         | 1        | 1         | 2         | 3         | 2         | 1         |
|      | 2         | 3         | 1         | 1         | 3         | 2         | 1        | 2         | 3         | 3         | 2         | 1         |
|      | 3         | 2         | 1         | 3         | 1         | 2         | 1        | 2         | 1         | 2         | 1         | 1         |
| SUM2 | <b>6</b>  | <b>8</b>  | <b>4</b>  | <b>5</b>  | <b>7</b>  | <b>6</b>  | <b>3</b> | <b>5</b>  | <b>6</b>  | <b>8</b>  | <b>5</b>  | <b>1</b>  |
| AD   | <b>2</b>  | <b>2</b>  | <b>1</b>  | <b>1</b>  | <b>1</b>  | <b>1</b>  | <b>1</b> | <b>1</b>  | <b>1</b>  | <b>2</b>  | <b>1</b>  | <b>1</b>  |
| SUM3 | <b>13</b> | <b>15</b> | <b>13</b> | <b>11</b> | <b>14</b> | <b>14</b> | <b>7</b> | <b>14</b> | <b>13</b> | <b>13</b> | <b>12</b> | <b>11</b> |
|      | ME        |           |           | RMSE      |           |           | ME       |           |           | RMSE      |           |           |
| SUM4 | <b>10</b> | <b>11</b> | <b>15</b> |           |           |           | <b>6</b> | <b>14</b> | <b>15</b> |           |           |           |
| SUM5 |           |           |           | <b>11</b> | <b>15</b> | <b>10</b> |          |           |           | <b>11</b> | <b>10</b> | <b>7</b>  |
| SUM6 | <b>44</b> | <b>55</b> | <b>51</b> |           |           |           |          |           |           |           |           |           |

Supplementary Material

Section S2 The distribution and their relative values of soil sampling points

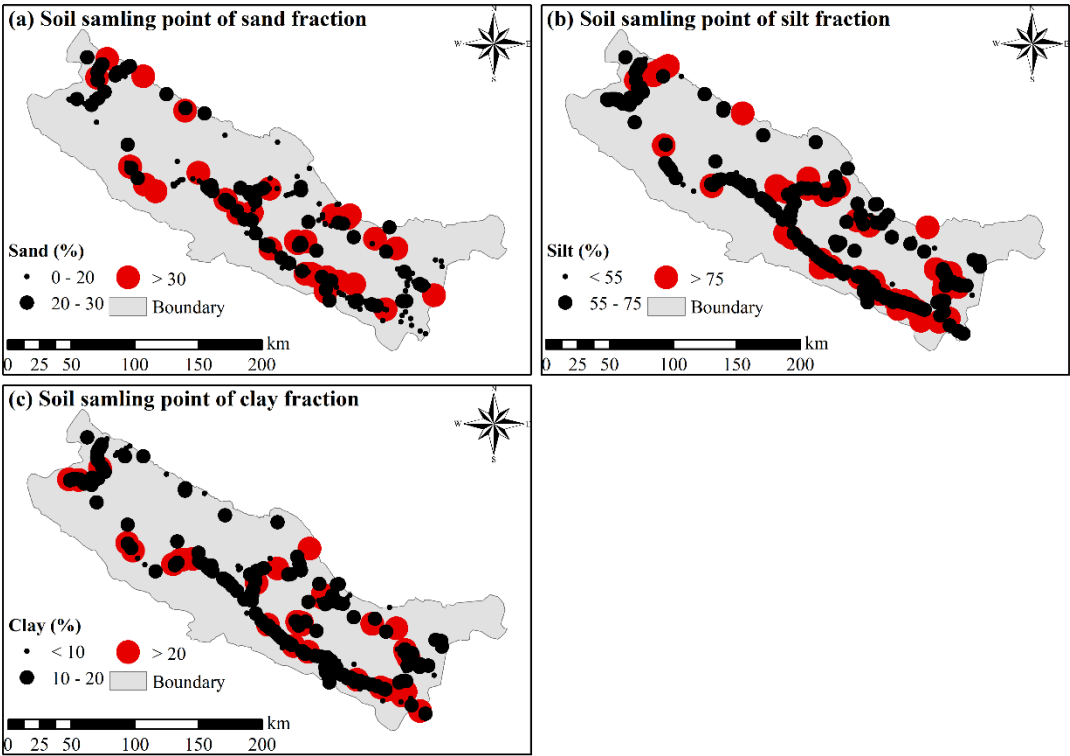

**Figure. S2.1** Distribution and relative values of soil sampling points for (a) sand, (b) silt and (c) clay fractions.

23

24

## Supplementary Material

25

### Section S3 The fitted biplots using random sampling test

26

27

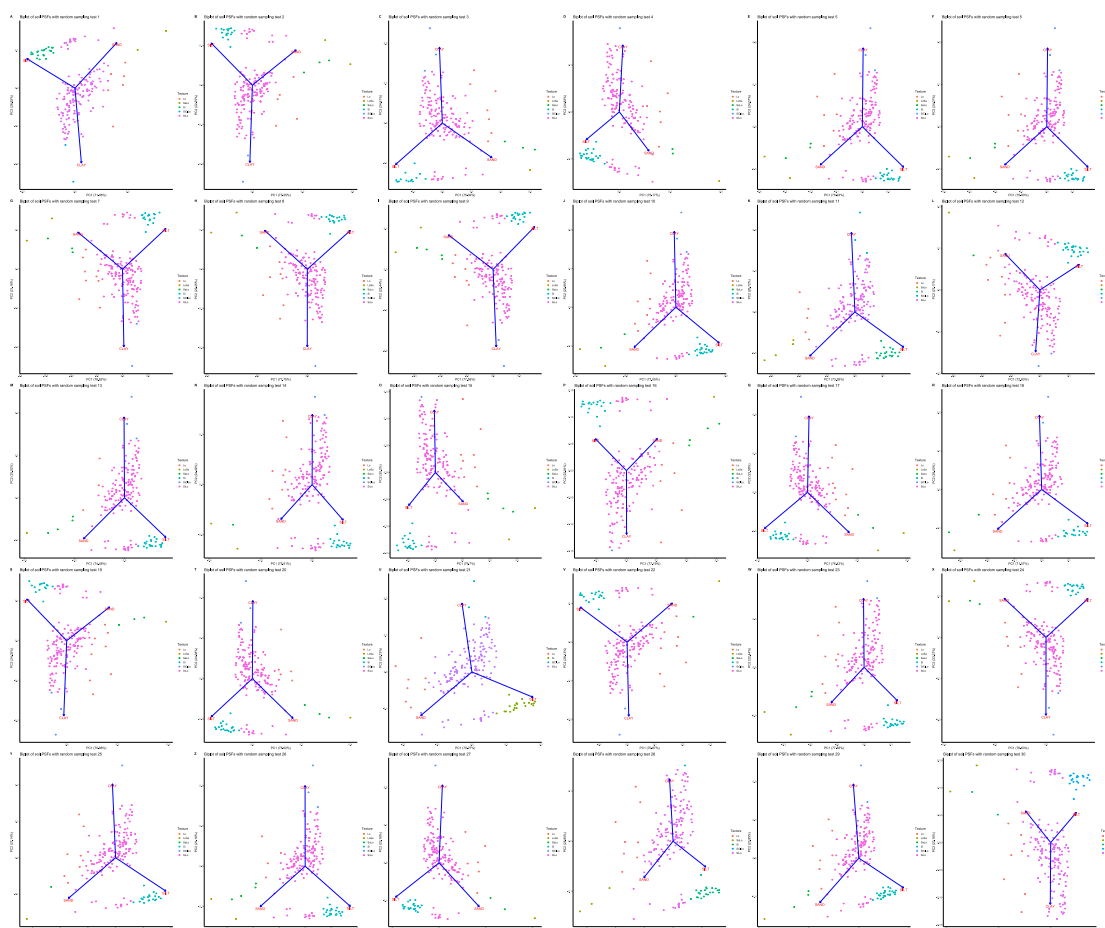

28

29

**Figure. S3.1** Biplots of soil PSFs data using random sampling test (30 times)

30
